# Supplementary material for: Engineered thin film nanocomposite membranes with a polyethyleneimine interlayered sulfonated MXene for superior groundwater desalination
Source: Royal Society of Chemistry journal article supplement (doi:10.1039/d4nj03913k), 2024-01-01
Supplement: d4nj03913k1.pdf [file d4nj03913k1.pdf]

**Engineered thin film nanocomposite membranes with polyethyleneimine interlayered sulfonated MXene for superior groundwater desalination**

Lukka Thuyavan Yogarathinam<sup>a</sup>, Nadeem Baig<sup>a,\*</sup>, Hassan Younas<sup>a</sup>, Gheorghe Falca<sup>a</sup>, Isam H. Aljundi<sup>a,b\*</sup>

*<sup>a</sup>Interdisciplinary Research Centre for Membranes and Water Security, King Fahd University of Petroleum and Minerals, Dhahran, 31261, Saudi Arabia*

*<sup>b</sup>Chemical Engineering Department, King Fahd University of Petroleum and Minerals, Dhahran, 31261 Saudi Arabia*

---

\*Corresponding authors E-mail address: Nadeem Baig (: [nadeembaig@kfupm.edu.sa](mailto:nadeembaig@kfupm.edu.sa)) Isam H. Aljundi ([aljundi@kfupm.edu.sa](mailto:aljundi@kfupm.edu.sa))

## High-resolution XPS spectra of SPMX:

The Ti 2p spectrum displayed two main peaks at binding energies of 458.86 eV and 464.63 eV, corresponding to the  $2p_{3/2}$  and  $2p_{1/2}$  electronic states, respectively. The S 2p peak was observed at 168.1 eV, which is attributed to the presence of sulfonic groups. The C 1s peak appeared at 284.8 eV, while the N 1s binding energy was recorded at 399.8 eV. Additionally, the F 1s peaks, representing the AlF and C-F bonds, were detected at binding energies of 689.2 eV and 684.6 eV, respectively. The O 1s peak was identified at 530.7 eV, as shown in Fig. S1.

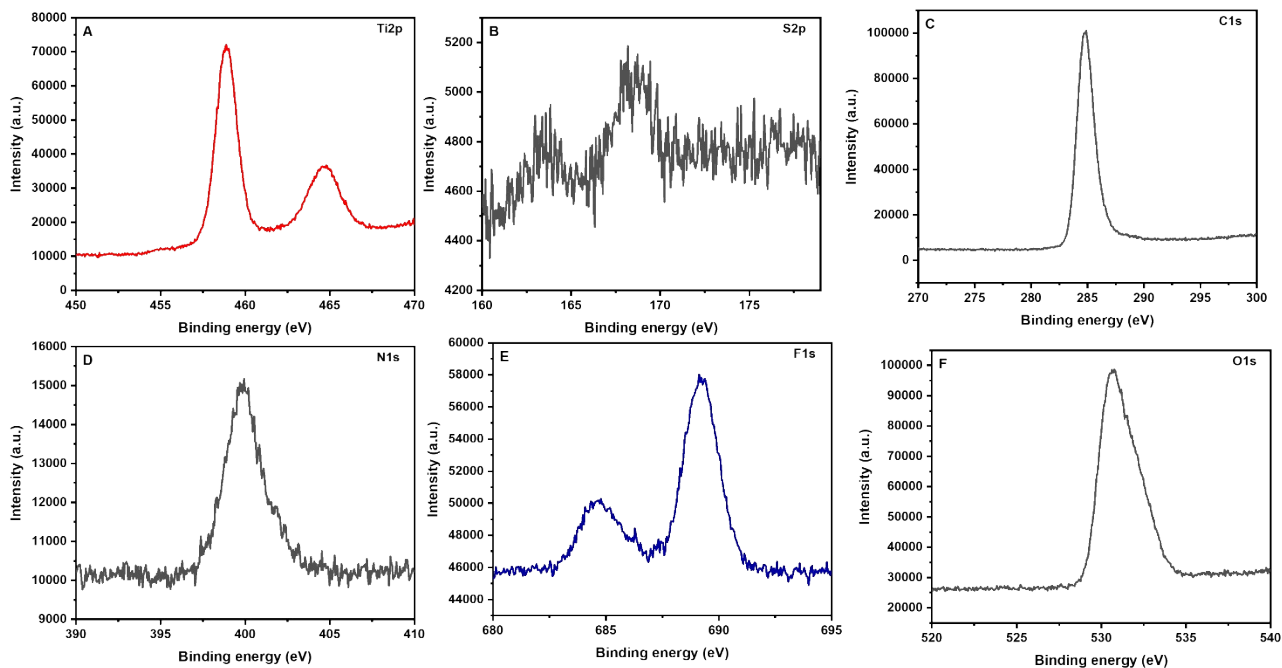

**Fig. S1** High-resolution XPS spectra of SPMX (A) Ti2p, (B) S2p, (C) C1s, (D) N1s, (E) F1s and (F) O1s

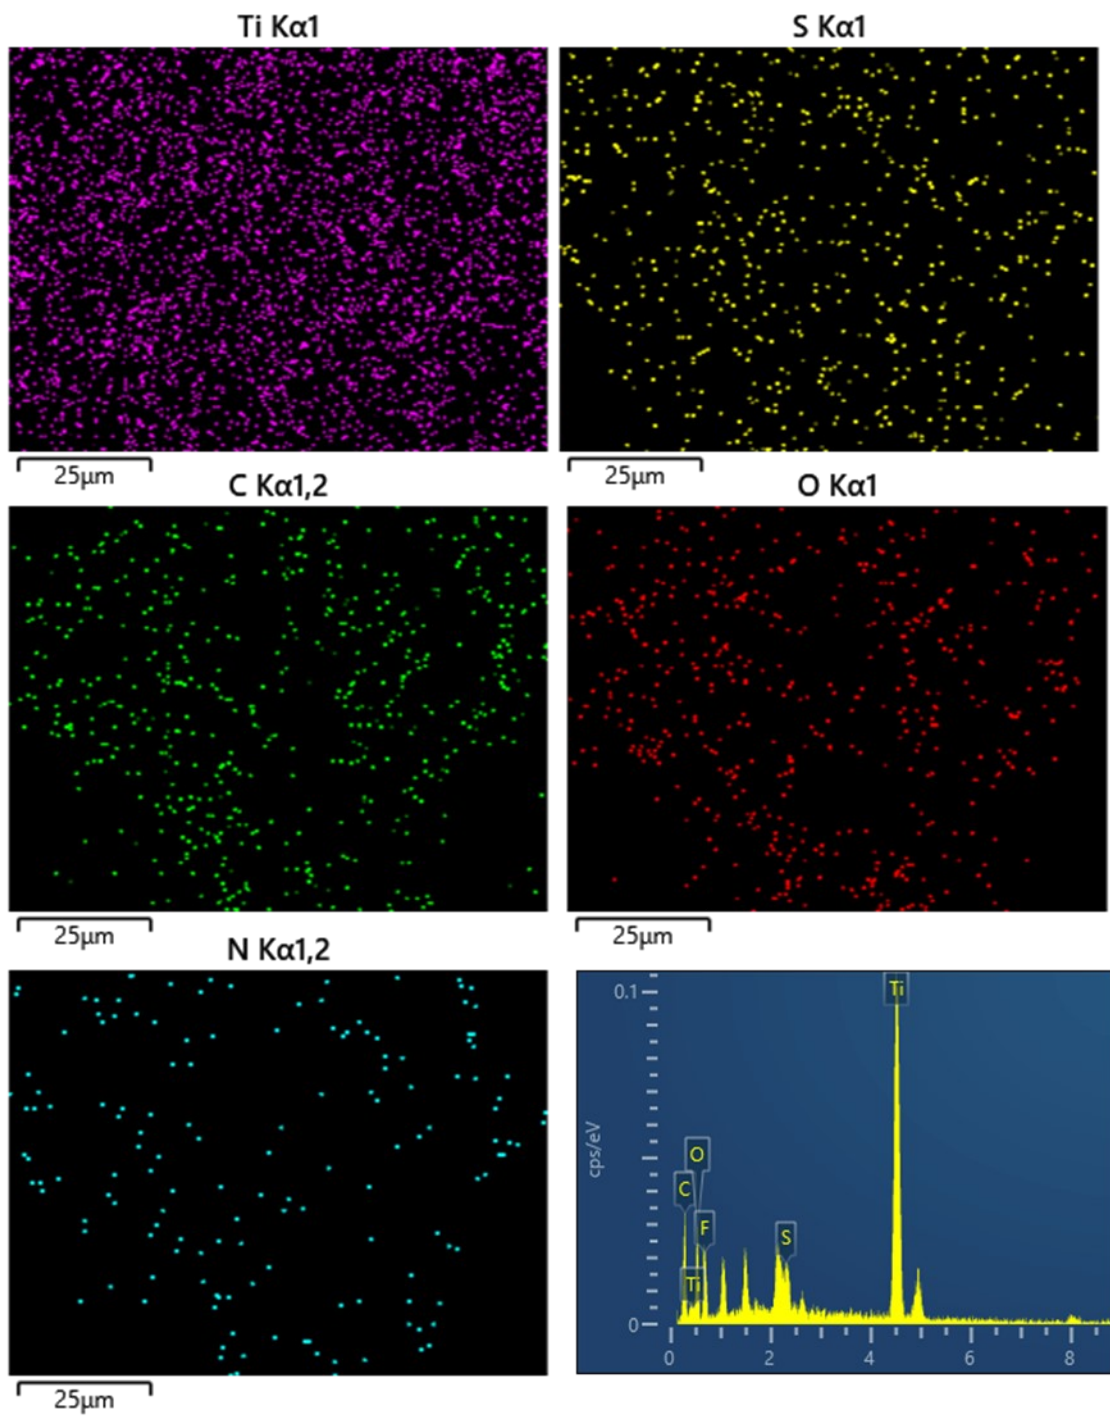

**Fig. S2** Elemental mapping and EDS spectrum of SPMX material

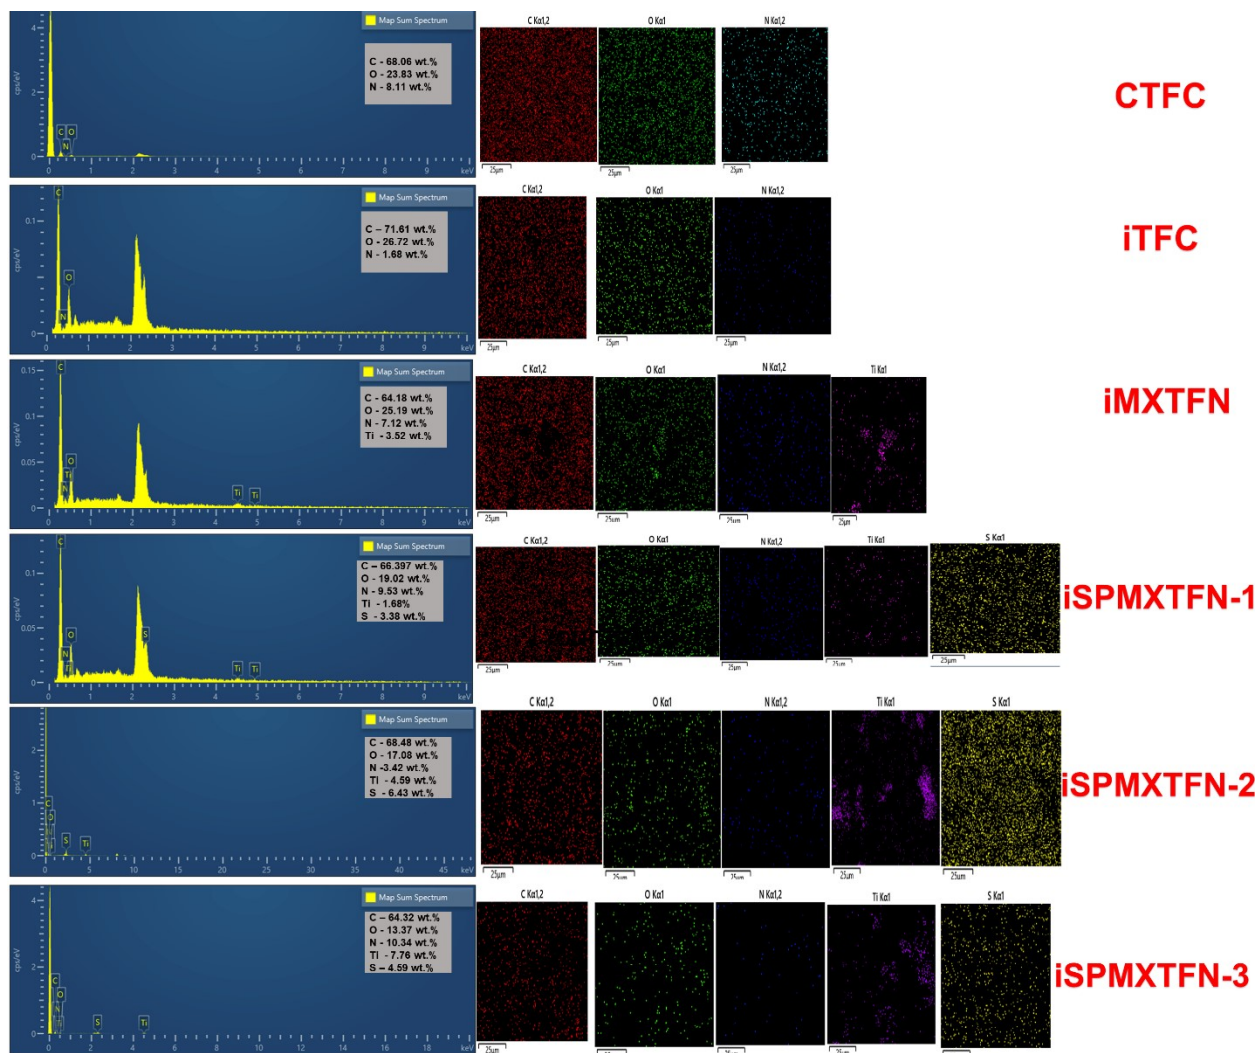

**Fig. S3** Elemental mapping of CTFC, iTFC, iMXTFN, and iSPMXTFN membranes.

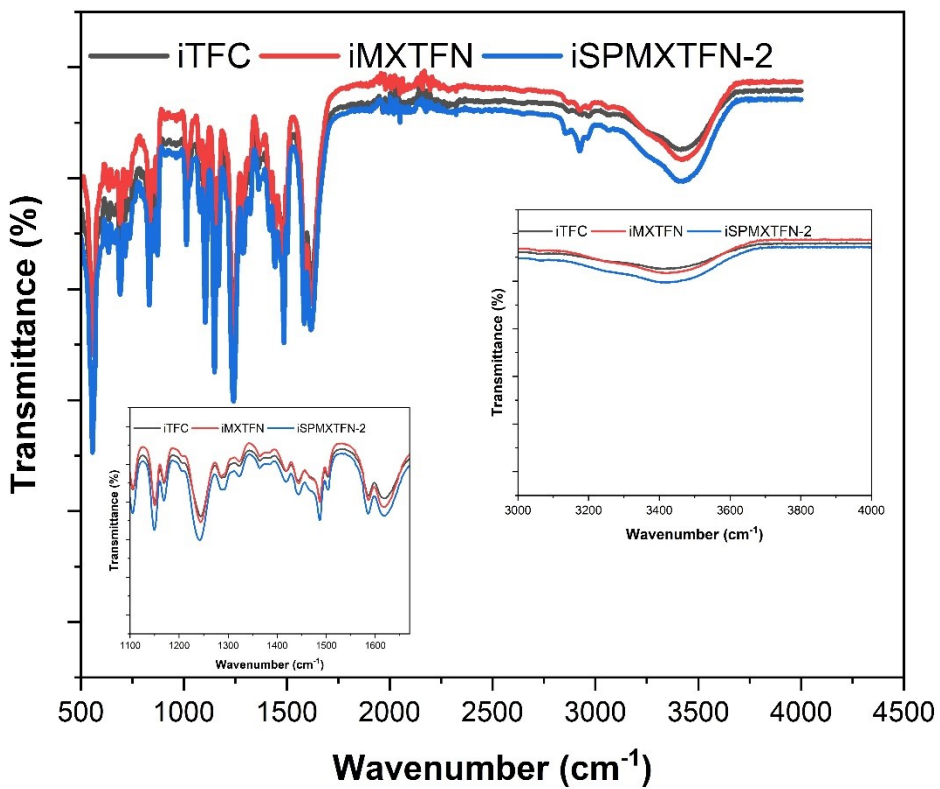

**Fig. S4** ATR-FTIR spectra of long-term stability analysis of iTFC, iMXTFN and iSPMXTFN-2 membranes.

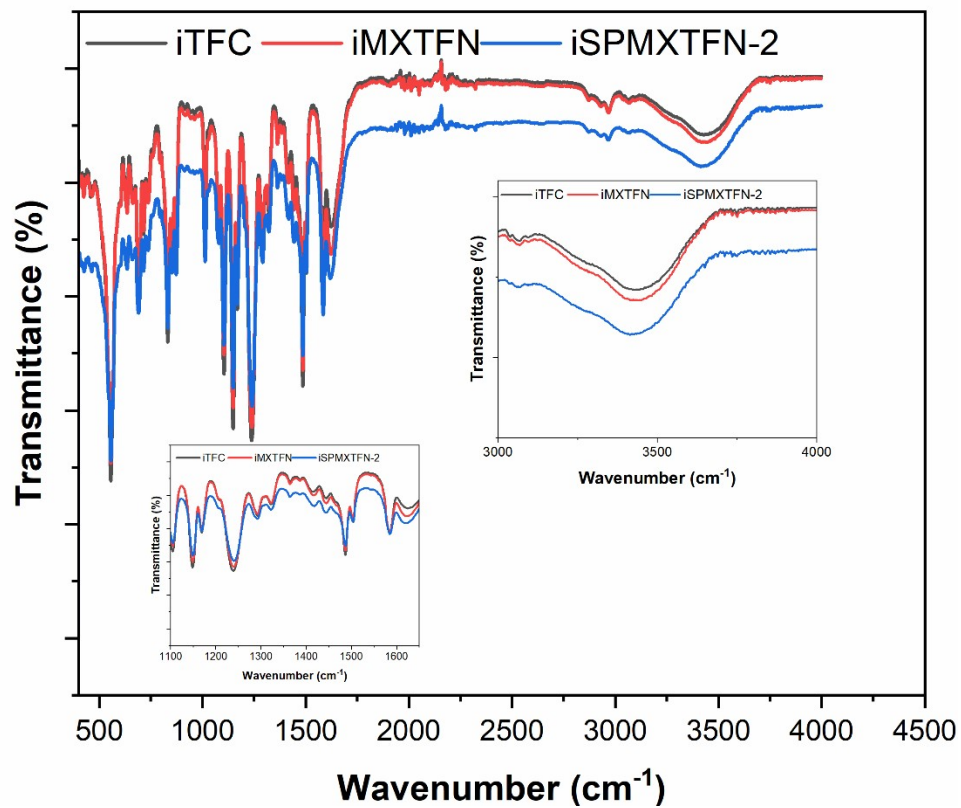

**Fig. S5** ATR-FTIR spectra of after chlorinated analysis of iTFC, iMXTFN and iSPMXTFN-2 membranes.

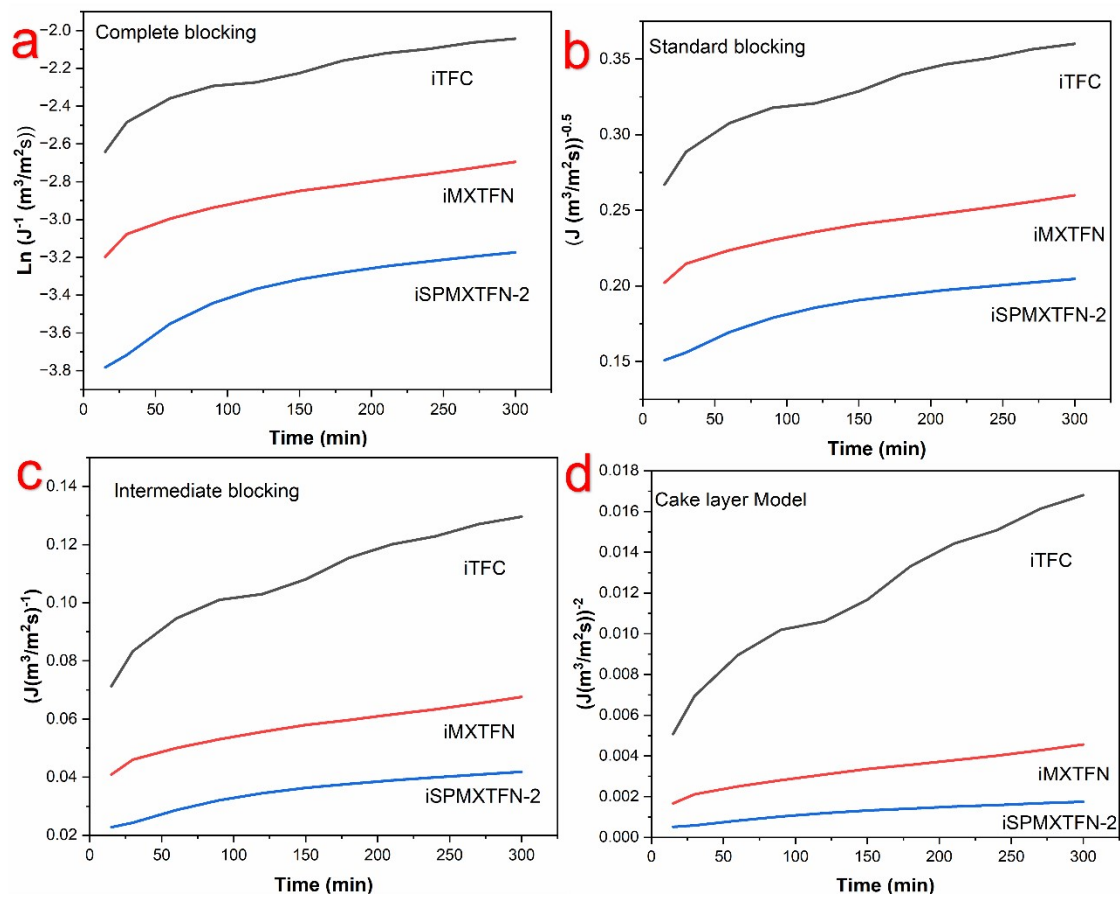

**Fig. S6** Pore blocking analysis of iTFC, iMXTFN and iSPMXTFN-2 membranes.
